# Supplementary material
Source: PubMed Central journal article supplement (PMC5623869)

Fig 1F

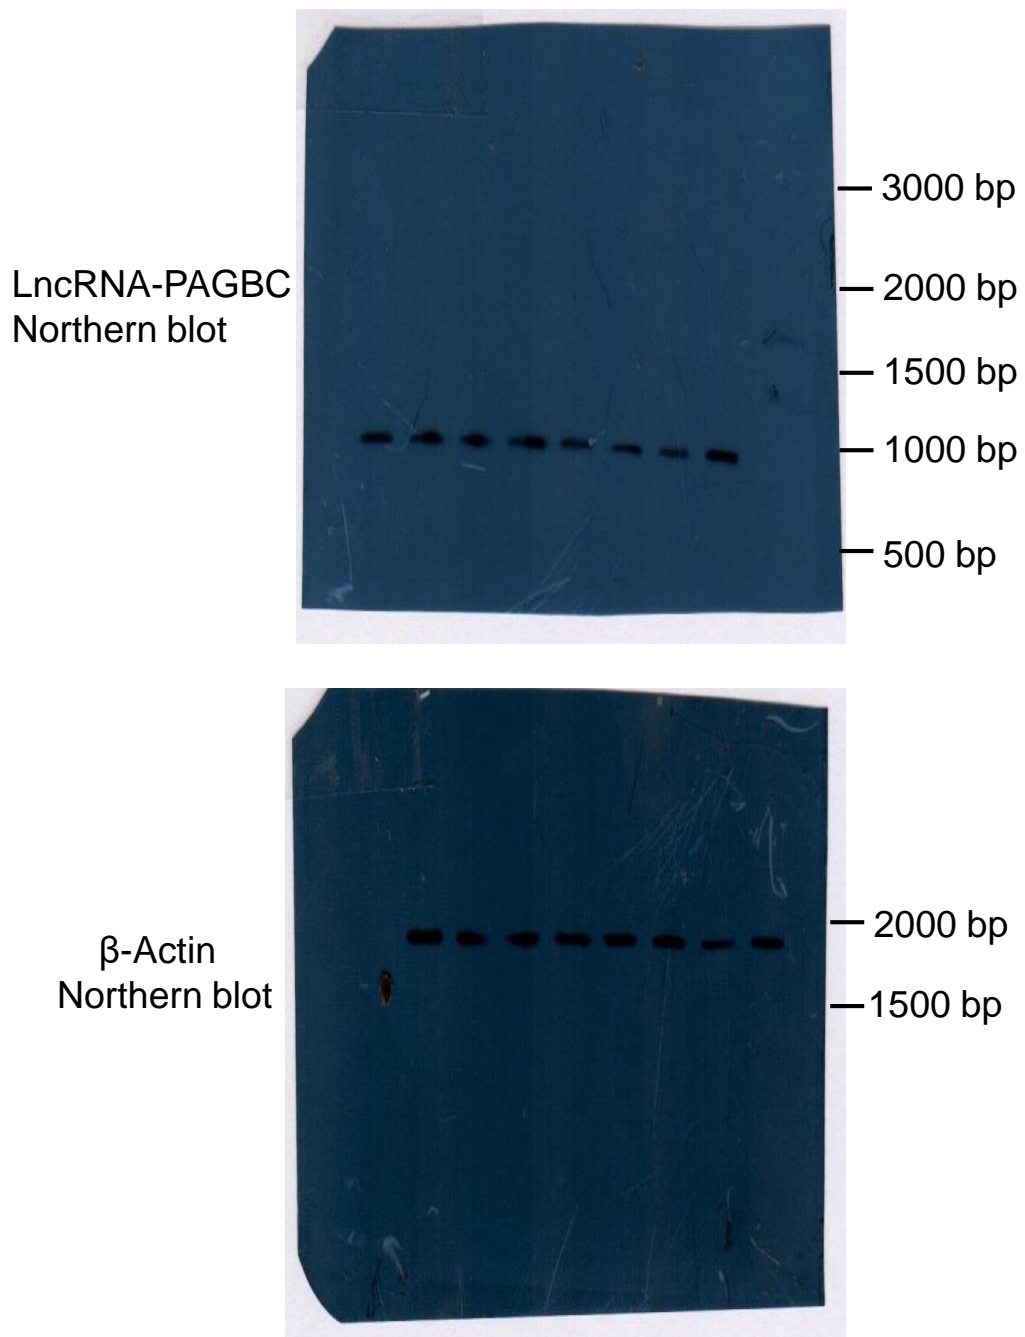

Supplement: EMBR-18-0-s005.pdf [file EMBR-18-0-s005.pdf]

Fig 6A LEFT

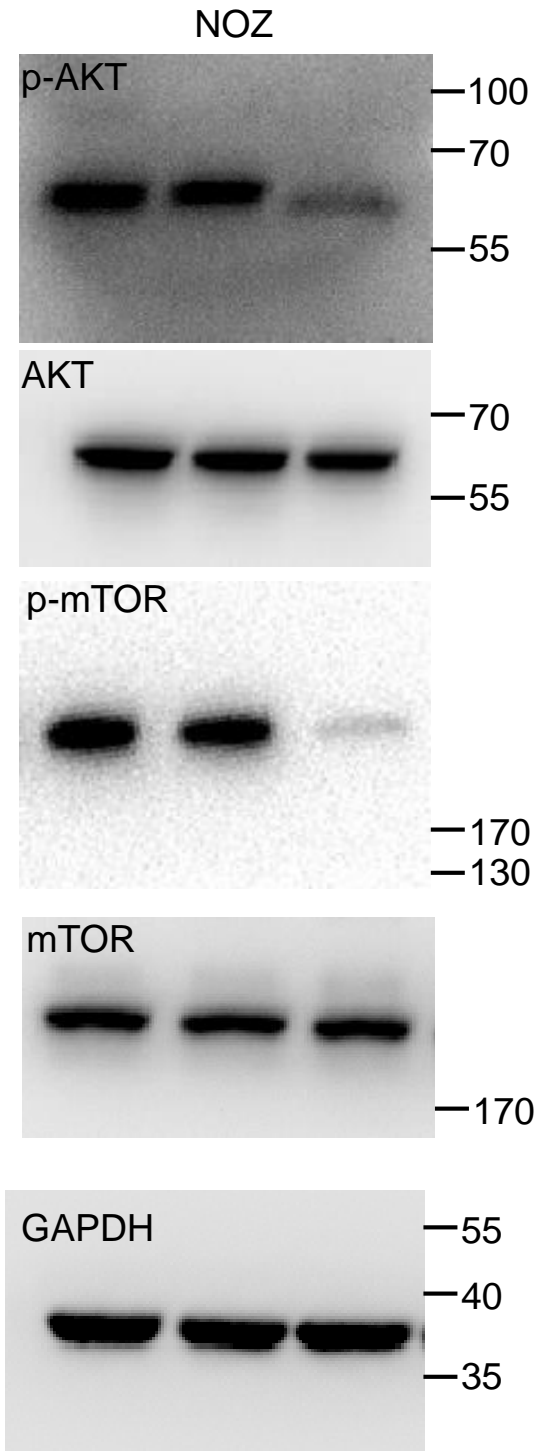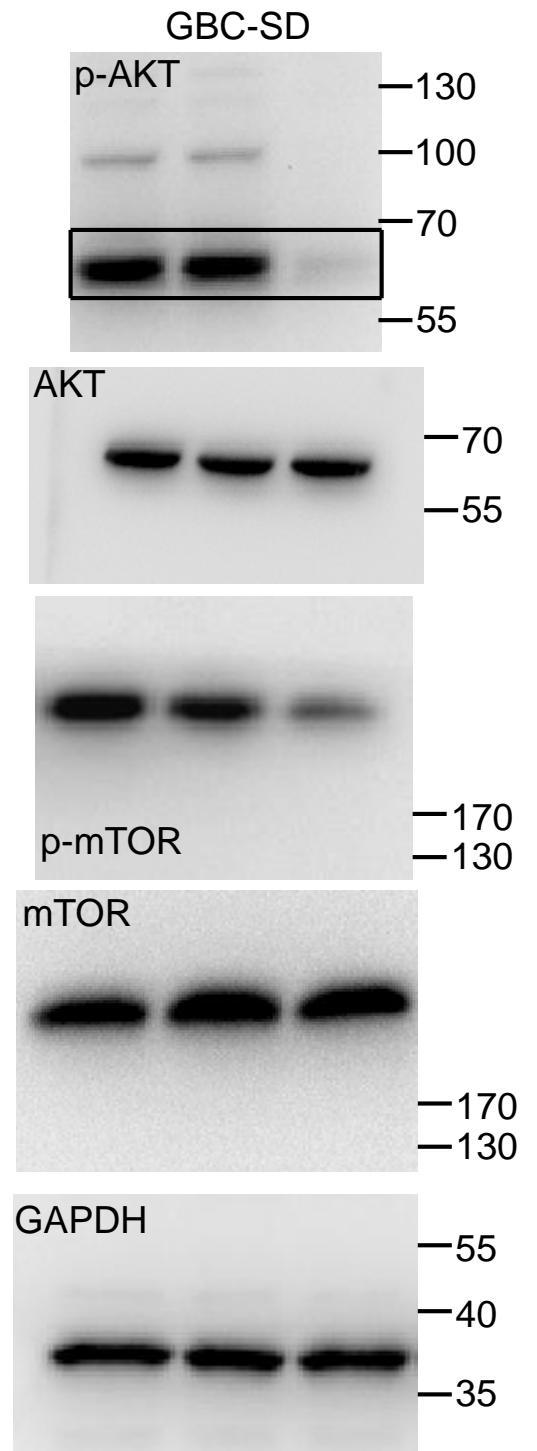

Fig 6A RIGHT

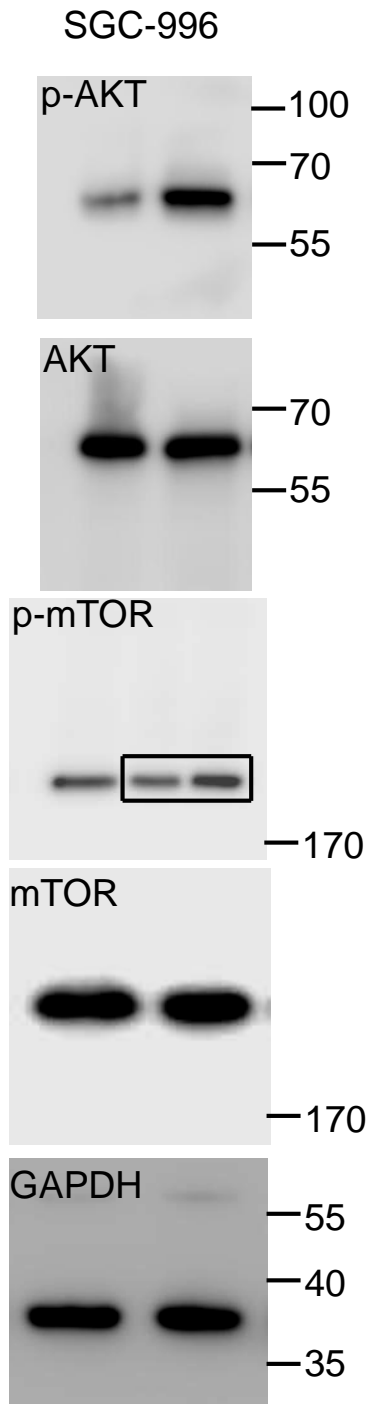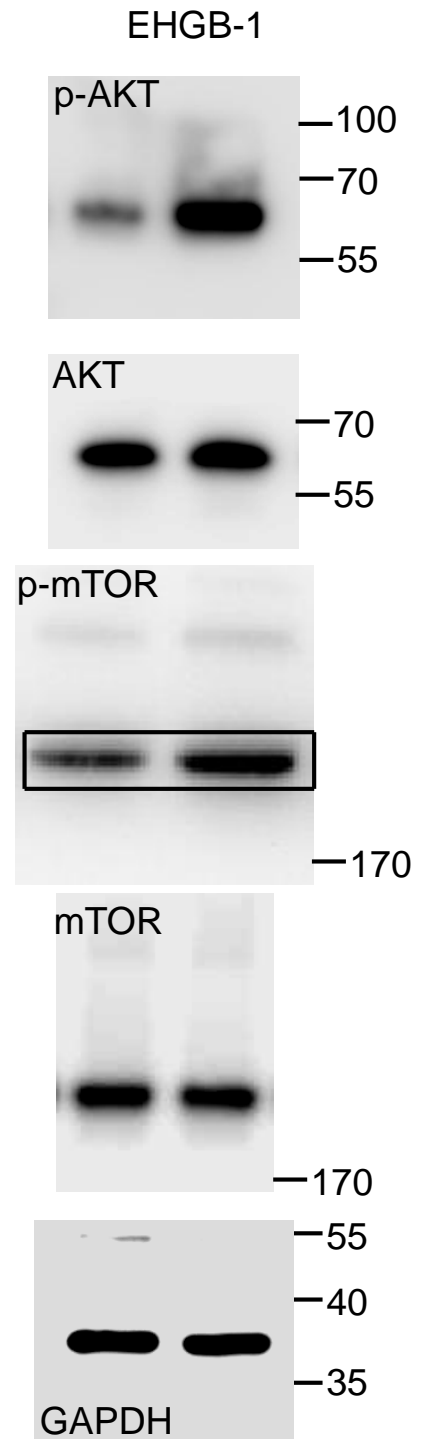

Fig 6D

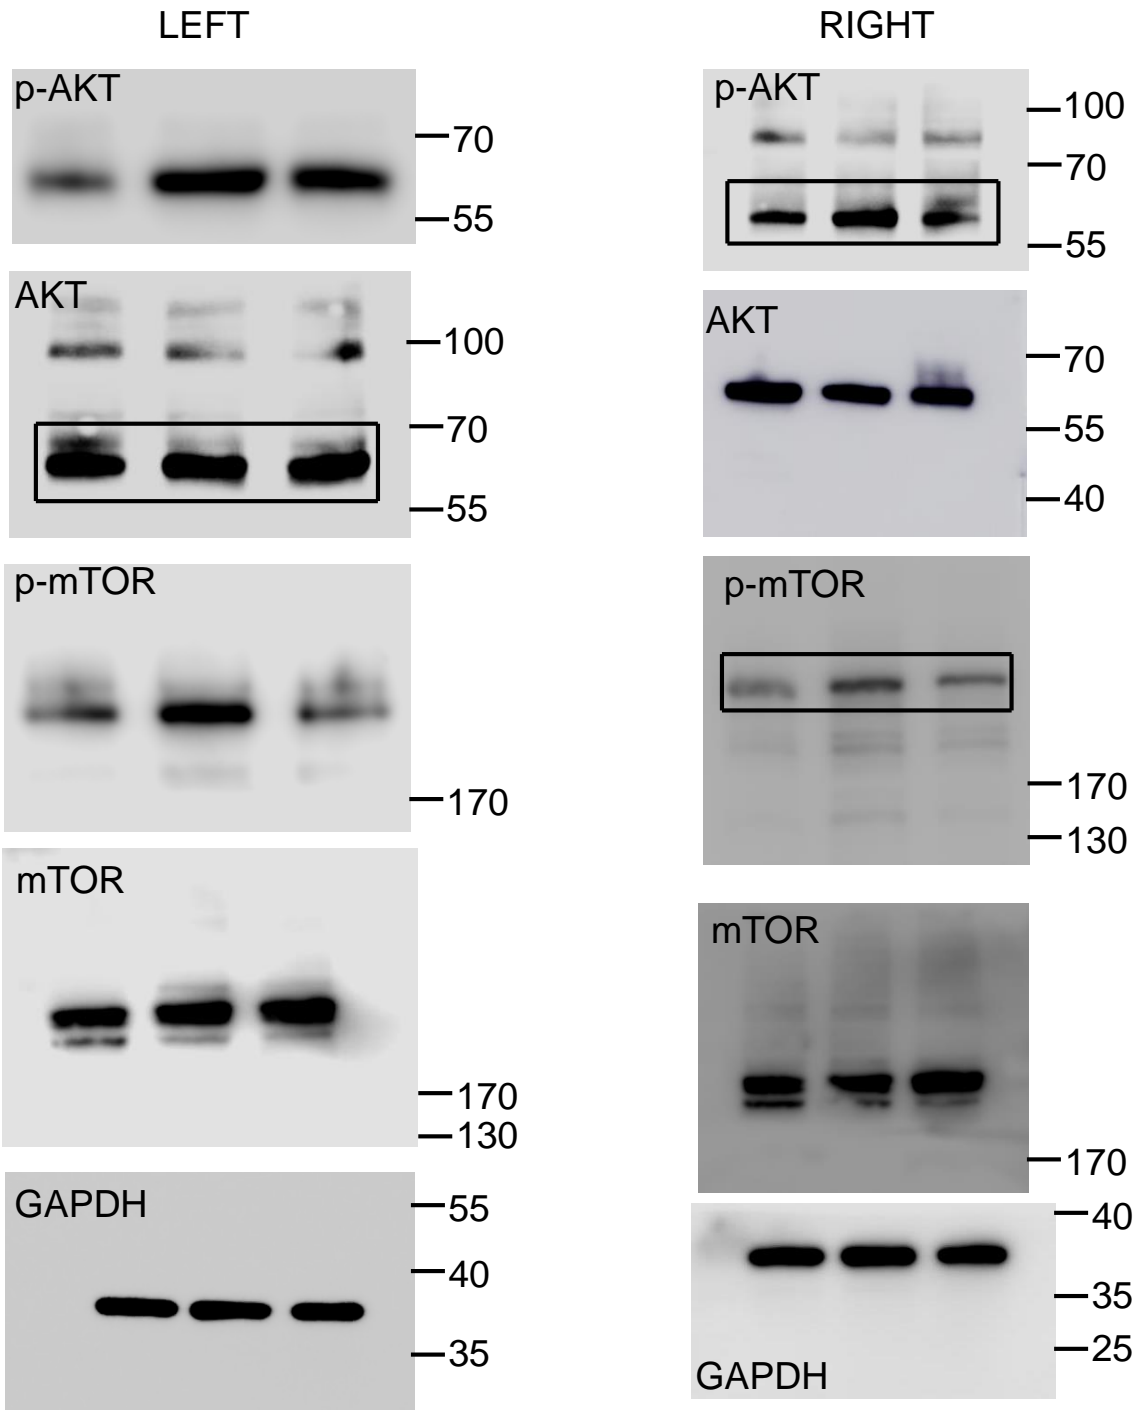

Fig 6G

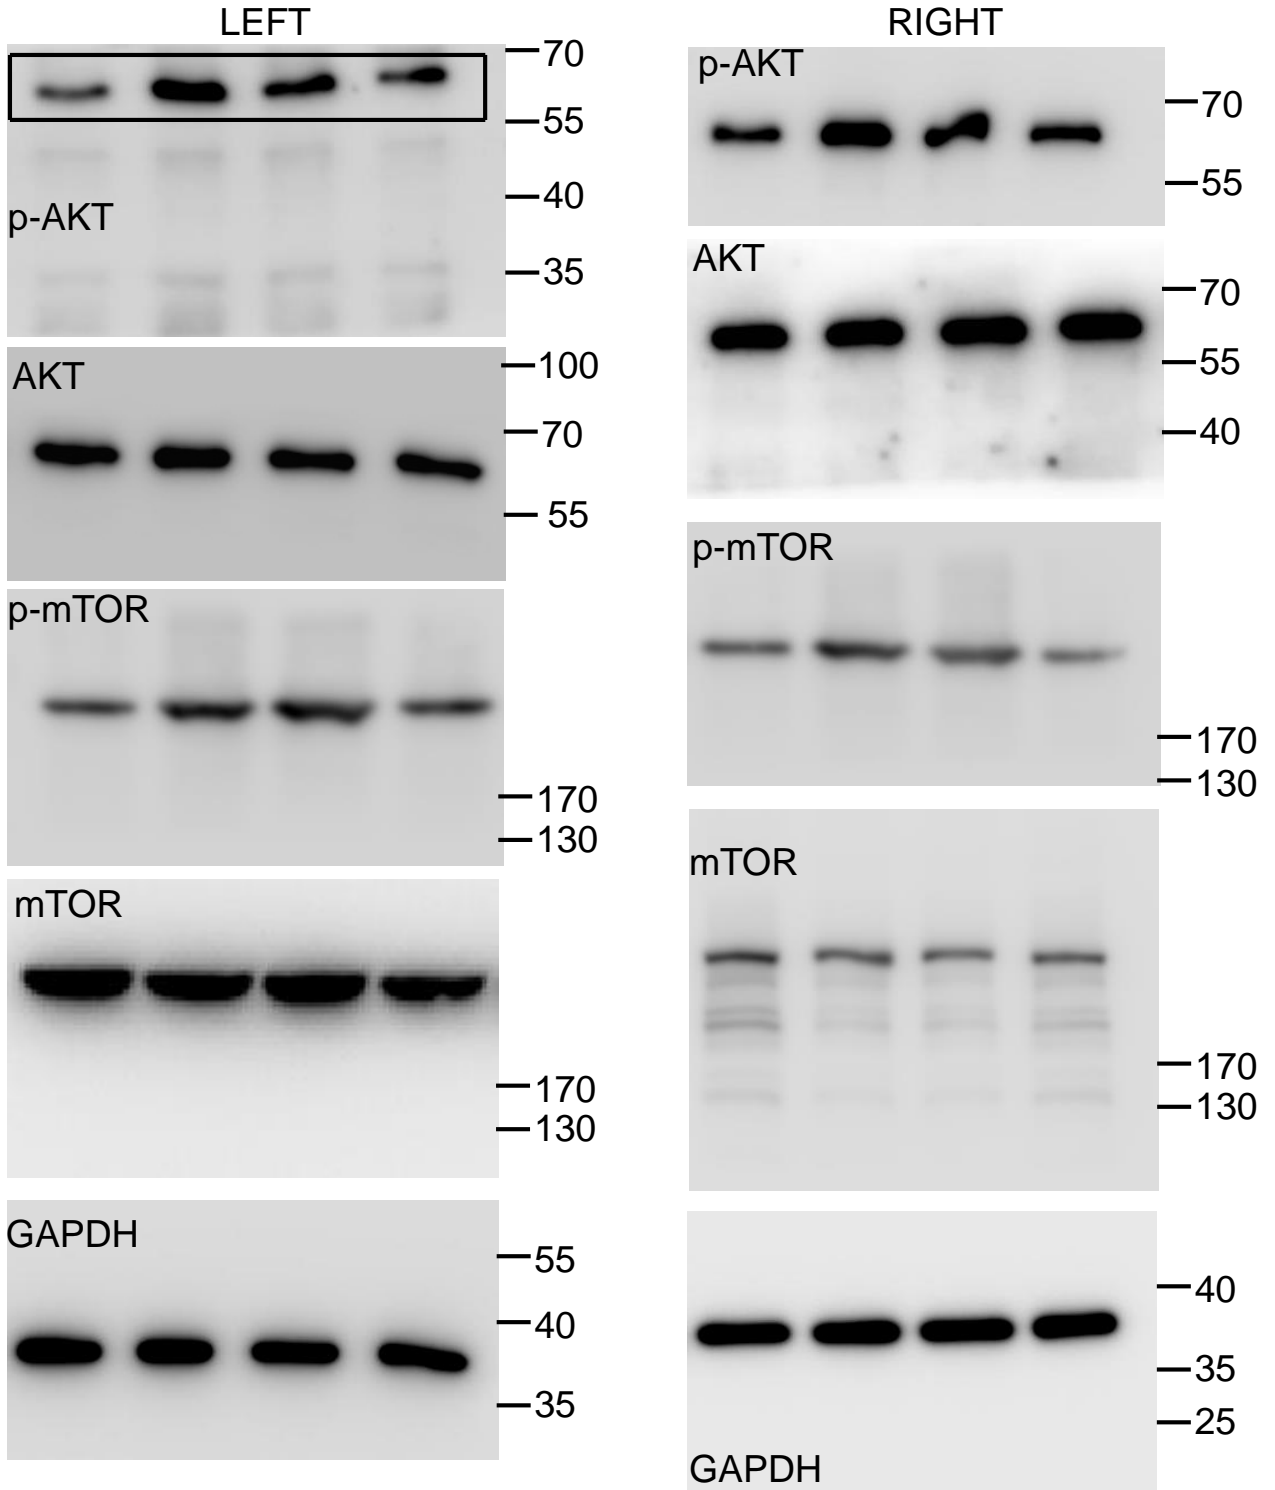

Supplement: EMBR-18-0-s007.pdf [file EMBR-18-0-s007.pdf]

Fig 7A

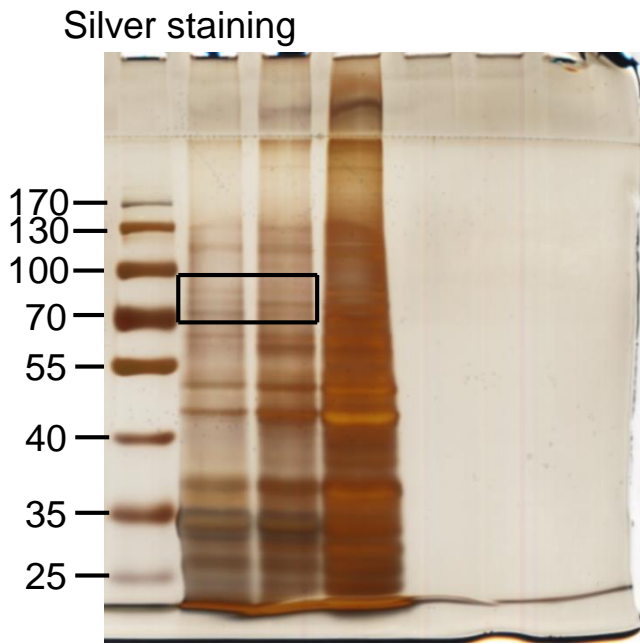

Fig 7B

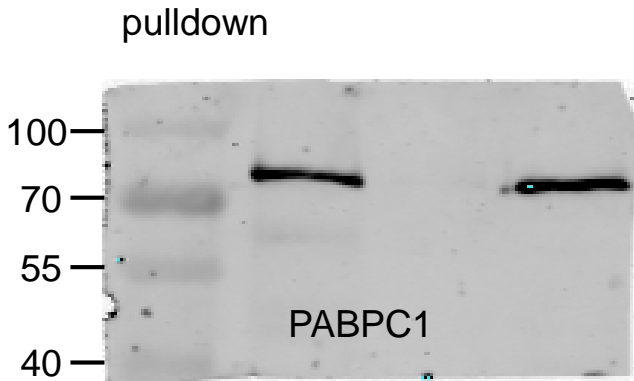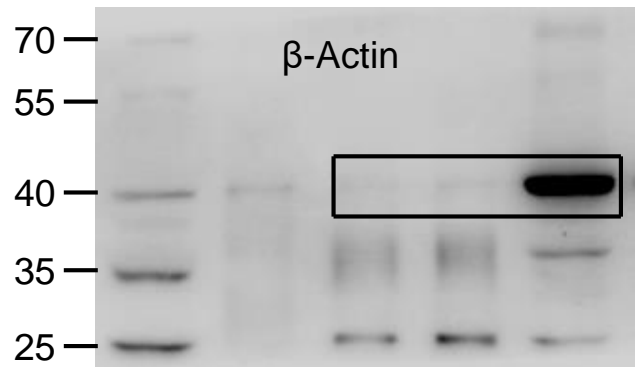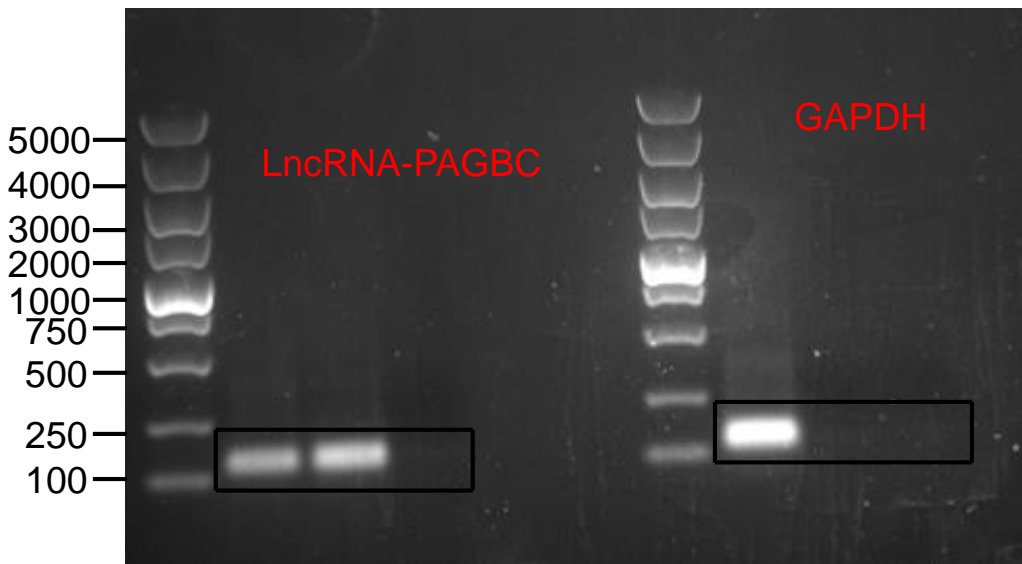

# Fig 7C

LEFT

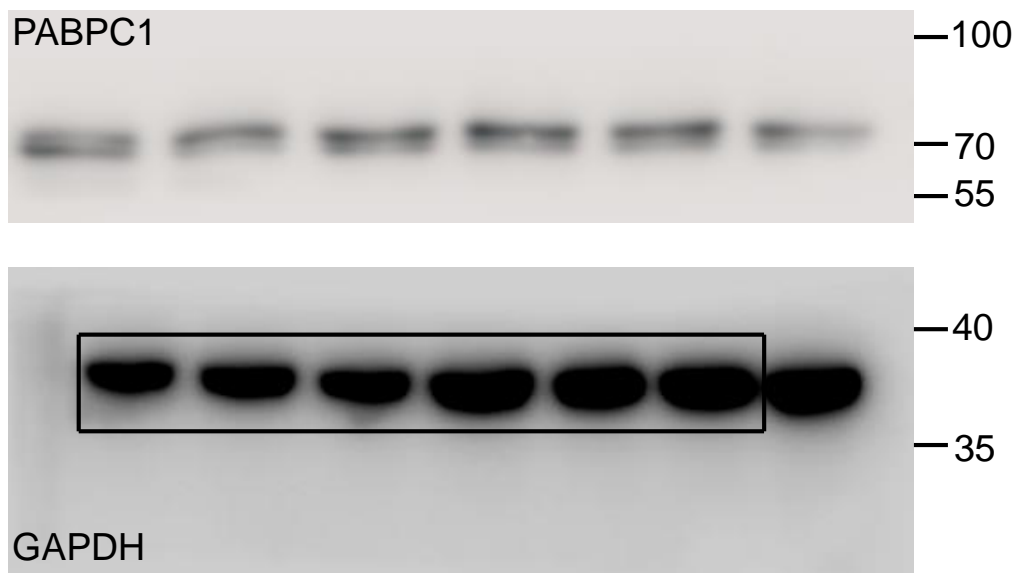

RIGHT

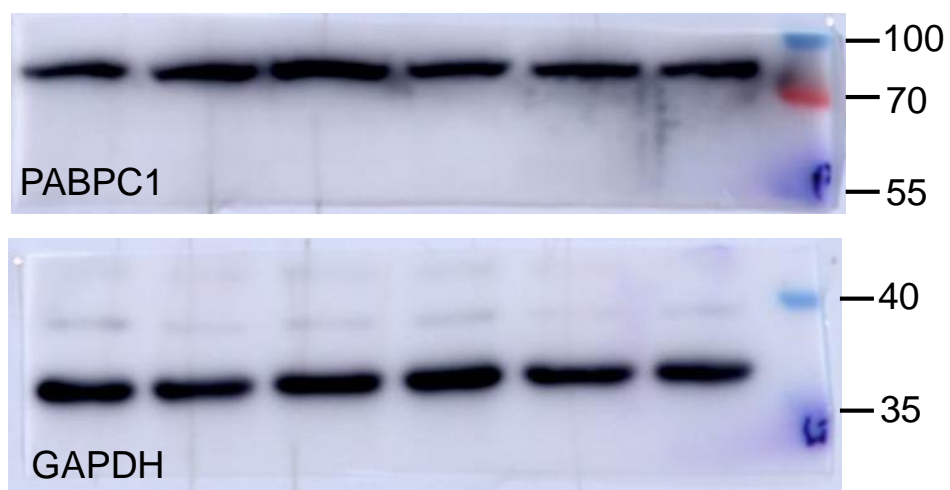

Supplement: EMBR-18-0-s008.pdf [file EMBR-18-0-s008.pdf]
